# Supplementary material for: Integrated Biomarker Analysis Reveals L1CAM as a Potential Stratification Marker for No Specific Molecular Profile High-Risk Endometrial Carcinoma
Source: MDPI journal article supplement (doi:10.3390/cancers14215429), 2022-11-03
Supplement: s1 [file s1]

## SUPPLEMENTARY MATERIALS

**Table S1.** Amplicons in the custom-made high-risk endometrial carcinoma NGS panel. For each amplicon the start and end position are presented in reference genome hg 19. Median amplicon length was 93 base pairs (range 77-104).

| Chromosome | Position start | Position end | Amplicon name  | Pool # | Gene   | Exon |
|------------|----------------|--------------|----------------|--------|--------|------|
| 3          | 41265956       | 41266042     | AMPL7170083667 | 1      | CTNNB1 | 3    |
| 3          | 41266034       | 41266122     | AMPL7170083217 | 2      | CTNNB1 | 3    |
| 3          | 41266111       | 41266202     | AMPL7170080333 | 1      | CTNNB1 | 3    |
| 3          | 41266186       | 41266273     | AMPL7170084011 | 2      | CTNNB1 | 3    |
| 12         | 133202644      | 133202733    | AMPL7170315715 | 1      | POLE   | 46   |
| 12         | 133202720      | 133202820    | AMPL7170315322 | 2      | POLE   | 46   |
| 12         | 133202783      | 133202873    | AMPL7170087761 | 1      | POLE   | 46   |
| 12         | 133202871      | 133202968    | AMPL7170313847 | 2      | POLE   | 46   |
| 12         | 133212433      | 133212524    | AMPL7170315610 | 1      | POLE   | 42   |
| 12         | 133212495      | 133212585    | AMPL7170311719 | 2      | POLE   | 42   |
| 12         | 133212566      | 133212650    | AMPL7170312360 | 1      | POLE   | 42   |
| 12         | 133218307      | 133218399    | AMPL7170315668 | 2      | POLE   | 39   |
| 12         | 133218354      | 133218445    | AMPL7170087850 | 1      | POLE   | 39   |
| 12         | 133218433      | 133218533    | AMPL7170311573 | 2      | POLE   | 39   |
| 12         | 133219086      | 133219183    | AMPL7170604674 | 2      | POLE   | 37   |
| 12         | 133219148      | 133219237    | AMPL7170604666 | 1      | POLE   | 37   |
| 12         | 133219234      | 133219330    | AMPL7170604675 | 2      | POLE   | 37   |
| 12         | 133219372      | 133219455    | AMPL7170315086 | 1      | POLE   | 36   |
| 12         | 133219435      | 133219539    | AMPL7170314571 | 2      | POLE   | 36   |
| 12         | 133219489      | 133219589    | AMPL7170087809 | 1      | POLE   | 36   |
| 12         | 133219584      | 133219679    | AMPL7170604772 | 2      | POLE   | 36   |
| 12         | 133226247      | 133226343    | AMPL7170604781 | 1      | POLE   | 30   |
| 12         | 133226326      | 133226430    | AMPL7170604778 | 2      | POLE   | 30   |
| 12         | 133226407      | 133226497    | AMPL7170604789 | 1      | POLE   | 30   |
| 12         | 133235865      | 133235953    | AMPL7170604771 | 2      | POLE   | 26   |
| 12         | 133235936      | 133236033    | AMPL7170312021 | 1      | POLE   | 26   |
| 12         | 133236024      | 133236110    | AMPL7170087651 | 2      | POLE   | 26   |
| 12         | 133244045      | 133244139    | AMPL7170087913 | 1      | POLE   | 20   |
| 12         | 133244122      | 133244218    | AMPL7170313927 | 2      | POLE   | 20   |
| 12         | 133244214      | 133244304    | AMPL7170312937 | 1      | POLE   | 20   |
| 12         | 133244900      | 133244985    | AMPL7170086397 | 2      | POLE   | 19   |
| 12         | 133244973      | 133245066    | AMPL7170311520 | 1      | POLE   | 19   |
| 12         | 133245062      | 133245165    | AMPL7170313170 | 2      | POLE   | 19   |
| 12         | 133249699      | 133249794    | AMPL7170102163 | 1      | POLE   | 14   |
| 12         | 133249790      | 133249882    | AMPL7170102124 | 2      | POLE   | 14   |
| 12         | 133250088      | 133250187    | AMPL7170092315 | 1      | POLE   | 13   |
| 12         | 133250222      | 133250313    | AMPL7170084021 | 1      | POLE   | 13   |
| 12         | 133251936      | 133252033    | AMPL7170083158 | 2      | POLE   | 12   |

| Chromosome | Position start | Position end | Amplicon name  | Pool # | Gene | Exon |
|------------|----------------|--------------|----------------|--------|------|------|
| 12         | 133252301      | 133252394    | AMPL7170084401 | 1      | POLE | 11   |
| 12         | 133252349      | 133252436    | AMPL7170083946 | 2      | POLE | 11   |
| 12         | 133252660      | 133252753    | AMPL7170083794 | 1      | POLE | 10   |
| 12         | 133252707      | 133252797    | AMPL7170083816 | 2      | POLE | 10   |
| 12         | 133252794      | 133252875    | AMPL7170577368 | 1      | POLE | 10   |
| 12         | 133253118      | 133253211    | AMPL7170083836 | 1      | POLE | 9    |
| 12         | 133253176      | 133253253    | AMPL7170577365 | 2      | POLE | 9    |

**Table S2.** Quality control of next-generation sequencing output files for each patient in terms of total coverage, on-target sequencing, average depth and uniformity.

| Patient ID | Coverage (bp) | On target (%) | Mean depth (x) | Uniformity (%) |
|------------|---------------|---------------|----------------|----------------|
| EC-BS01    | 717505        | 88.94         | 16197          | 97.6           |
| EC-BS02    | 123871        | 84.99         | 2671           | 99.4           |
| EC-BS03    | 1044977       | 76.25         | 19800          | 96.09          |
| EC-BS05    | 671181        | 92.02         | 15801          | 98.16          |
| EC-BS06    | 138709        | 89.74         | 3154           | 97.33          |
| EC-BS07    | 161315        | 90.14         | 3707           | 97.33          |
| EC-BS08    | 140203        | 86.17         | 3039           | 97.33          |
| EC-BS09    | 93492         | 71.56         | 1616           | 99.4           |
| EC-BS10    | 141754        | 85.28         | 3057           | 95.97          |
| EC-BS11    | 139934        | 85.9          | 3056           | 97.33          |
| EC-BS12    | 165279        | 80.79         | 3360           | 97.33          |
| EC-BS13    | 184406        | 83.61         | 3906           | 97.33          |
| EC-BS14    | 62406         | 61.8          | 902            | 97.33          |
| EC-BS15    | 157216        | 82.69         | 3274           | 97.33          |
| EC-BS16    | 153916        | 89.16         | 3476           | 97.33          |
| EC-BS17    | 203797        | 87.98         | 4467           | 97.33          |
| EC-BS18    | 458435        | 88.66         | 10206          | 97.33          |
| EC-BS19    | 139236        | 87.03         | 3005           | 99.38          |
| EC-BS20    | 274626        | 74.79         | 4992           | 97.29          |
| EC-BS21    | 95431         | 56.75         | 1170           | 97.15          |
| EC-BS22    | 116644        | 90.03         | 2703           | 96.99          |
| EC-BS23    | 113989        | 72.3          | 1994           | 96.73          |
| EC-BS24    | 125215        | 86.22         | 2751           | 96.99          |
| EC-BS25    | 89312         | 69.9          | 1531           | 96.57          |
| EC-BS26    | 150676        | 79.13         | 2994           | 97.33          |
| EC-BS27    | 88674         | 78.18         | 1715           | 97.09          |
| EC-BS28    | 148243        | 74.64         | 2783           | 96.65          |
| EC-BS29    | 84024         | 76.46         | 1636           | 95.31          |
| EC-BS30    | 74570         | 88.65         | 1666           | 96.05          |
| EC-BS33    | 169424        | 90.51         | 3888           | 96.72          |
| EC-BS34    | 101985        | 80.94         | 2040           | 99.36          |
| EC-BS35    | 113388        | 80.52         | 2309           | 94.94          |

| <b>Patient ID</b> | <b>Coverage (bp)</b> | <b>On target (%)</b> | <b>Mean depth (x)</b> | <b>Uniformity (%)</b> |
|-------------------|----------------------|----------------------|-----------------------|-----------------------|
| EC-BS37           | 216196               | 88.88                | 4859                  | 97.32                 |
| EC-BS38           | 587651               | 73.41                | 10839                 | 97.33                 |
| EC-BS39           | 91557                | 88.06                | 2032                  | 96.62                 |
| EC-BS40           | 209573               | 84.09                | 4475                  | 97.11                 |
| EC-BS41           | 234259               | 92.39                | 5464                  | 96.01                 |
| EC-BS42           | 114937               | 84.28                | 2448                  | 97.21                 |
| EC-BS43           | 64992                | 85.06                | 1401                  | 95.93                 |
| EC-BS44           | 120576               | 91.41                | 2816                  | 97.25                 |
| EC-BS46           | 68537                | 90.53                | 1597                  | 96.31                 |
| EC-BS48           | 51673                | 89.93                | 1194                  | 96.99                 |
| EC-BS49           | 110093               | 89.05                | 2485                  | 97.16                 |
| EC-BS50           | 563138               | 77.14                | 10866                 | 97.33                 |
| EC-BS51           | 62384                | 84.05                | 1317                  | 97.43                 |
| EC-BS52           | 558023               | 87.78                | 12531                 | 97.13                 |
| EC-BS53           | 497697               | 88.69                | 11232                 | 96.24                 |
| EC-BS54           | 88381                | 91.35                | 2066                  | 96.24                 |
| EC-BS55           | 703517               | 81.53                | 14256                 | 96.78                 |
| EC-BS56           | 173878               | 82.73                | 3623                  | 97.41                 |
| EC-BS57           | 198888               | 90.07                | 4656                  | 96.09                 |
| EC-BS58           | 121769               | 87.92                | 2728                  | 96.51                 |
| EC-BS59           | 87772                | 87.9                 | 1943                  | 96.15                 |
| EC-BS60           | 93819                | 89.77                | 2138                  | 97.33                 |
| EC-BS61           | 126349               | 89.99                | 2902                  | 97.33                 |
| EC-BS62           | 64812                | 84.58                | 1386                  | 97.25                 |
| EC-BS63           | 44197                | 84.27                | 914                   | 94.71                 |
| EC-BS64           | 295241               | 90.96                | 6883                  | 96.24                 |
| EC-BS65           | 36608                | 92.53                | 864                   | 97.12                 |
| EC-BS66           | 203599               | 88.15                | 4561                  | 97.15                 |
| EC-BS67           | 31737                | 89.37                | 713                   | 95.71                 |
| EC-BS68           | 35488                | 88.5                 | 787                   | 97.33                 |
| EC-BS69           | 25820                | 87.13                | 568                   | 97.17                 |
| EC-BS70           | 143108               | 86.74                | 3140                  | 97.33                 |
| EC-BS71           | 165707               | 92.16                | 3833                  | 95.94                 |
| EC-BS72           | 371935               | 83.49                | 7809                  | 97.07                 |
| EC-BS73           | 144491               | 95.16                | 3512                  | 93.24                 |
| EC-BS74           | 157920               | 85.29                | 3394                  | 97.33                 |
| EC-BS75           | 243404               | 95.03                | 5934                  | 92.86                 |
| EC-BS76           | 586620               | 89.24                | 13308                 | 95.98                 |
| EC-BS77           | 421039               | 92.72                | 9821                  | 96.24                 |
| EC-BS78           | 426066               | 90.39                | 9710                  | 94.67                 |
| EC-BS79           | 143124               | 86.53                | 3123                  | 97.33                 |
| EC-BS80           | 147611               | 95.92                | 3576                  | 94.92                 |
| EC-BS81           | 388286               | 93.9                 | 8988                  | 94.48                 |
| EC-BS83           | 539496               | 82.86                | 11201                 | 98.37                 |
| EC-BS84           | 107795               | 81.61                | 2215                  | 96.8                  |
| EC-BS86           | 159732               | 90.29                | 3592                  | 96.47                 |
| EC-BS87           | 708899               | 47.22                | 7892                  | 94                    |
| EC-BS88           | 193859               | 84.08                | 4098                  | 96.46                 |
| EC-BS89           | 749355               | 77.87                | 14288                 | 96.16                 |

| Patient ID | Coverage (bp) | On target (%) | Mean depth (x) | Uniformity (%) |
|------------|---------------|---------------|----------------|----------------|
| EC-BS91    | 94165         | 67.6          | 1528           | 97.33          |
| EC-BS92    | 236347        | 74.45         | 4555           | 97.26          |
| EC-BS93    | 624301        | 67.14         | 10625          | 96.19          |
| EC-BS95    | 150683        | 89.06         | 3410           | 96.16          |

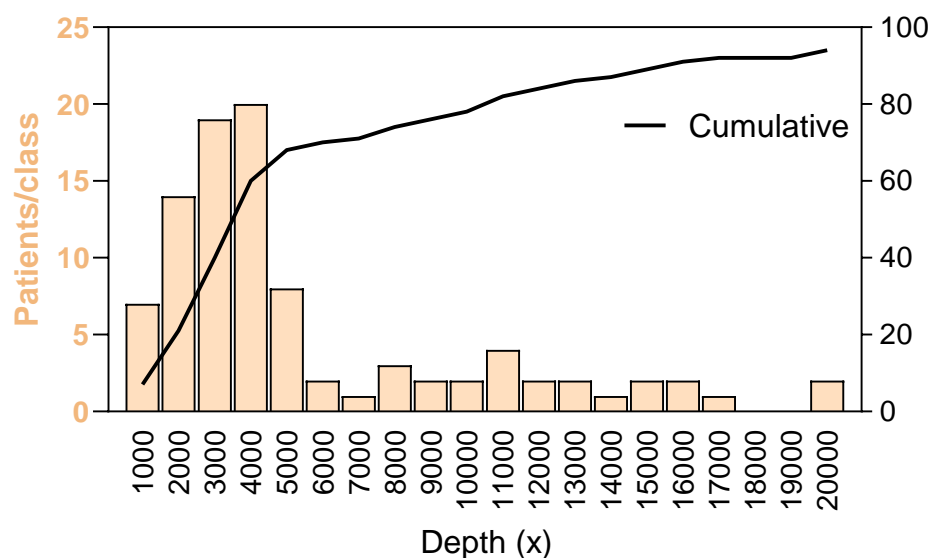

**Figure S1.** Distribution of sequencing depth in 1000x-wide classes (orange bars) and cumulative sum (black line) according to the number of patients belonging to each class.

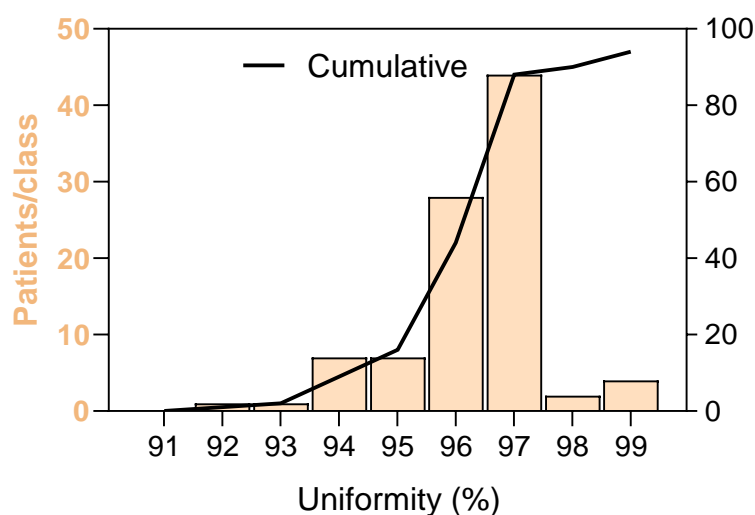

**Figure S2.** Distribution of sequencing uniformity in 1%-wide classes (orange bars) and cumulative sum (black line) according to the number of patients belonging to each class.

**Table S3.** Pathogenic variants in the POLE exonuclease domain.

| Patient's code | POLE exon | Nucleotide substitution | Protein change | Allele Frequency |
|----------------|-----------|-------------------------|----------------|------------------|
| EC-BS20        | 9         | c.857C>G                | P286R          | 39%              |
| EC-BS82        | 9         | c.857C>G                | P286R          | 17%              |
| EC-BS83        | 9         | c.857C>G                | P286R          | 34%              |
| EC-BS84        | 9         | c.857C>G                | P286R          | 21%              |
| EC-BS5         | 9         | c.890C>T                | S297F          | 15%              |
| EC-BS70        | 9         | c.890C>T                | S297F          | 22%              |
| EC-BS72        | 13        | c.1231G>C               | V411L          | 31%              |
| EC-BS29        | 13        | c.1231G>T               | V411L          | 38%              |
| EC-BS48        | 13        | c.1231G>T               | V411L          | 42%              |
| EC-BS18        | 13        | c.1231G>T               | V411L          | 31%              |
| EC-BS85        | 13        | c.1231G>T               | V411L          | 34%              |
| EC-BS91        | 14        | c.1366G>C               | A456P          | 30%              |
| EC-BS93        | 14        | c.1366G>C               | A456P          | 40%              |
| EC-BS86        | 14        | c.1366G>C               | A456P          | 34%              |
| EC-BS92        | 14        | c.1376C>T               | S459F          | 39%              |
| EC-BS48        | 14        | c.1376C>T               | S459F          | 44%              |

**Table S4.** Non-pathogenic variants in POLE exons 9-14, 19, 20, 26, 30, 36, 37, 39, 42, and 46.

| Patient's code | POLE exon | Nucleotide substitution | Protein change | Allele Frequency |
|----------------|-----------|-------------------------|----------------|------------------|
| EC-BS70        | 12        | c.1149G>A               | M383I          | 11%              |
| EC-BS64        | 12        | c.1187A>G               | E396G          | 28%              |
| EC-BS1         | 14        | C.1394C>T               | A465V          | 36%              |
| EC-BS 14       | 26        | c.3271G>A               | E1091K         | 5%               |
| EC-BS 84       | 30        | c.3703C>A               | L1235I         | 24%              |
| EC-BS 87       | 30        | c.3595G>A               | E1199K         | 7%               |
| EC-BS 2        | 36        | c.4576C>A               | L1526I         | 48%              |
| EC-BS 18       | 36        | c.4666C>T               | R1536W         | 19%              |
| EC-BS 34       | 37        | c.4798A>G               | I1600V         | 9%               |
| EC-BS 87       | 37        | c.4735C>T               | R1579C         | 12%              |
| EC-BS 87       | 37        | c.4876C>T               | R1626C         | 7%               |
| EC-BS 94       | 37        | c.4849A>G               | I1617V         | 9%               |
| EC-BS 9        | 42        | c.5794C>T               | R1932C         | 6%               |
| EC-BS 82       | 42        | c.5705C>A               | S1902T         | 11%              |
| EC-BS 18       | 46        | c.6418G>A               | E2140K         | 50%              |
| EC-BS 52       | 46        | c.6418G>A               | E2140K         | 51%              |
| EC-BS 59       | 46        | c.6418G>A               | E2140K         | 51%              |
| EC-BS 72       | 46        | c.6439C>T               | P2147S         | 30%              |
| EC-BS 82       | 46        | c.6380G>A               | R2127Q         | 16%              |
| EC-BS 91       | 46        | c.6494G>A               | R2165H         | 45%              |

**Table S5.** Clinicopathological characteristics of “multiple-classifier” EC patients of the Brescia cohort.

|                                             | Patient's code   |            |                  |                  |                  |                  |
|---------------------------------------------|------------------|------------|------------------|------------------|------------------|------------------|
|                                             | EC-BS5           | EC-BS29    | EC-BS70          | EC-BS72          | EC-BS85          | EC-BS1           |
| <b>Molecular subtype</b>                    | POLE-mut         | POLE-mut   | POLE-mut         | POLE-mut         | POLE-mut         | MMR-D            |
| <b>Age (years)</b>                          | 70               | 64         | 31               | 44               | 63               | 47               |
| <b>Histotype</b>                            | end              | non-end    | non-end          | end              | end              | end              |
| <b>Myometrial invasion</b>                  | M2               | M1         | M1               | M1               | M2               | M2               |
| <b>Tumor Grade</b>                          | G3               | G3         | G3               | G2               | G3               | G3               |
| <b>LVSI</b>                                 | yes              | no         | yes              | yes              | yes              | yes              |
| <b>Lymph node metastasis</b>                | pos              | neg        | neg              | neg              | neg              | pos              |
| <b>FIGO stage</b>                           | IIIC             | IB         | IA               | IA               | IB               | IV               |
| <b>Risk Group (ESGO/ESTRO/ESP 2020)*</b>    | High             | High       | High             | High-int.        | High-int.        | High             |
| <b>POLE</b>                                 | <b>mut</b>       | <b>mut</b> | <b>mut</b>       | <b>mut</b>       | <b>mut</b>       | wt               |
| <b>MMR</b>                                  | <b>deficient</b> | proficient | <b>deficient</b> | <b>deficient</b> | <b>deficient</b> | <b>deficient</b> |
| <b>p53</b>                                  | wt               | <b>abn</b> | wt               | wt               | wt               | <b>abn</b>       |
| <b>CTNNB1</b>                               | wt               | wt         | wt               | wt               | wt               | wt               |
| <b>ARID1A</b>                               | loss             | loss       | loss             | present          | present          | loss             |
| <b>L1CAM</b>                                | neg              | pos        | neg              | neg              | neg              | neg              |
| <b>ER (%)</b>                               | 40               | 0          | 90               | 0                | 70               | 0                |
| <b>PR (%)</b>                               | 15               | 0          | 70               | 5                | 30               | 0                |
| <b>KI-67 (%)</b>                            | 50               | 65         | 30               | 15               | 60               | 45               |
| <b>Degree of inflammation</b>               | prominent        | moderate   | prominent        | moderate         | prominent        | weak             |
| <b>Recurrence</b>                           | no               | no         | yes              | no               | no               | no               |
| <b>Adjuvant Therapy</b>                     | CT + RT          | CT         | CT               | RT               | RT               | CT               |
| <b>Time to recurrence after CT (months)</b> | -                | -          | 42               | -                | -                | -                |
| <b>Status at the last follow up</b>         | NED              | NED        | NED              | NED              | NED              | NED              |
| <b>DSS (months)</b>                         | 78               | 145        | 78               | 89               | 165              | 168              |

RT, radiotherapy; CT, platinum-based adjuvant chemotherapy; NED, no evidence of disease.

\*Concin N. et al. [1]

**Table S6.** List of variants in the CTNNB1 exon 3.

| Patient's code | Nucleotide substitution | Protein change | Allele Frequency | Coverage | CTNNB1 ClinVar classification                       | CTNNB1 variants already described in EC |
|----------------|-------------------------|----------------|------------------|----------|-----------------------------------------------------|-----------------------------------------|
| EC-BS3         | c.97T>C                 | S33P           | 11%              | 14183    | Likely path.                                        | Kim G et al. [2]                        |
| EC-BS61        | c.97T>G                 | S33A           | 39%              | 3671     | Likely path.                                        | Kim G et al. [2]                        |
| EC-BS27        | c.98C>A                 | S33Y           | 22%              | 1073     | Path./Likely path.                                  | Kim G et al. [2]                        |
| EC-BS34        | c.98C>A                 | S33Y           | 11%              | 5229     | Path./Likely path.                                  | Kim G et al. [2]                        |
| EC-BS73        | c.98C>A                 | S33Y           | 6%               | 2150     | Path./Likely path.                                  | no                                      |
| EC-BS37        | c.98C>T                 | S33F           | 24%              | 2030     | Path./Likely path., other                           | Kim G et al. [2]                        |
| EC-BS3         | c.100G>A                | G34R           | 5%               | 14190    | Likely path.                                        | Liu Y et al. [3]                        |
| EC-BS53        | c.198G>A                | W66            | 23%              | 15842    | Path.                                               | no                                      |
| EC-BS79        | c.100C>G                | S37C           | 31%              | 2936     | Path./Likely path.                                  | Kim G et al. [2]                        |
| EC-BS69        | c.101G>T                | G34V           | 33%              | 293      | Conflicting interpretations of pathogenicity        | Kim G et al. [2]                        |
| EC-BS17        | c.110 C>T               | S37F           | 20%              | 7384     | Path./Likely path.                                  | Liu Y et al. [3]                        |
| EC-BS40        | c.121A>G                | T41A           | 24%              | 2482     | Conflicting interpretations of pathogenicity, other | Kim G et al. [2]                        |
| EC-BS46        | c.122C>T                | T41I           | 7%               | 4719     | Path./Likely path.                                  | Kim G et al. [2]                        |
| EC-BS53        | c.134C>A                | S45Y           | 9%               | 9566     | Path./Likely path.                                  | no                                      |

Path, pathogenic.

**Table S7.** Univariable survival analysis for disease-specific survival (DSS) and progression-free survival (PFS) according to additional biomarkers within each molecular subtype of the Brescia cohort.

| Variables                 | MMR-D (n. 34) |           |         | NSMP (n. 20) |           |              | p53abn (n. 25) |           |         |
|---------------------------|---------------|-----------|---------|--------------|-----------|--------------|----------------|-----------|---------|
|                           | HR            | 95%CI     | p-value | HR           | 95%CI     | p-value      | HR             | 95%CI     | p-value |
| <b>DSS</b>                |               |           |         |              |           |              |                |           |         |
| L1CAM (pos vs neg)        | 1.23          | 0.15-10.0 | 0.848   | 3.93         | 1.03-14.9 | <b>0.045</b> | 1.54           | 0.50-4.75 | 0.456   |
| ARID1A (loss vs present)  | 0.64          | 0.15-2.70 | 0.500   | 0.37         | 0.10-1.32 | 0.127        | 0.63           | 0.08-4.85 | 0.659   |
| CTNNB1 (mut vs wt)        | 1.68          | 0.34-8.35 | 0.529   | 0.52         | 0.14-1.98 | 0.334        | -              | -         | -       |
| ER (10% of increment)     | 0.93          | 0.77-1.12 | 0.423   | 0.83         | 0.66-1.05 | 0.118        | 0.99           | 0.80-1.23 | 0.952   |
| PR (10% of increment)     | 0.94          | 0.76-1.16 | 0.569   | 0.77         | 0.60-1.00 | 0.052        | 0.60           | 0.29-1.24 | 0.169   |
| Ki67 (10% of increment)   | 0.72          | 0.48-1.07 | 0.107   | 1.2          | 0.93-1.55 | 0.159        | 1.04           | 0.86-1.26 | 0.707   |
| Inflammation (m/p vs a/w) | 0.33          | 0.07-1.65 | 0.176   | 0.76         | 0.31-1.89 | 0.557        | 0.82           | 0.31-2.17 | 0.686   |
| <b>PFS</b>                |               |           |         |              |           |              |                |           |         |
| L1CAM (pos vs neg)        | 0.62          | 0.08-4.74 | 0.616   | 4.12         | 1.22-13.9 | <b>0.023</b> | 1.31           | 0.47-3.66 | 0.605   |
| ARID1A (loss vs present)  | 0.68          | 0.23-2.04 | 0.548   | 0.70         | 0.25-1.97 | 0.498        | 0.59           | 0.08-4.48 | 0.609   |
| CTNNB1 (mut vs wt)        | 2.03          | 0.61-6.22 | 0.263   | 1.21         | 0.43-3.39 | 0.718        | -              | -         | -       |
| ER (10% of increment)     | 1.03          | 0.89-1.20 | 0.723   | 0.88         | 0.75-1.03 | 0.110        | 1.01           | 0.82-1.24 | 0.931   |
| PR (10% of increment)     | 1.05          | 0.90-1.22 | 0.611   | 0.84         | 0.70-1.00 | <b>0.045</b> | 0.59           | 0.30-1.19 | 0.140   |
| Ki67 (10% of increment)   | 0.82          | 0.61-1.10 | 0.240   | 1.13         | 0.91-1.38 | 0.265        | 1.02           | 0.84-1.25 | 0.816   |
| Inflammation (m/p vs a/w) | 0.28          | 0.08-1.02 | 0.054   | 0.68         | 0.22-2.17 | 0.520        | 0.72           | 0.28-1.85 | 0.499   |

The POLE group was not analysed due to the almost total absence of events (none for DSS and one for PFS).

Inflammation: m/p, moderate/prominent; a/w, absent/weak.

HR, hazard ratio; CI, confidence interval. Significant p-values are in bold.

## References

1. Concin N, Matias-Guiu X, Vergote I, Cibula D, Mirza MR, Marnitz S, Ledermann J, Bosse T, Chargari C, Fagotti A, Fotopoulou C, Gonzalez Martin A, Lax S, Lorusso D, Marth C, Morice P, Nout RA, O'Donnell D, Querleu D, Raspollini MR, Sehouli J, Sturdza A, Taylor A, Westermann A, Wimberger P, Colombo N, Planchamp F, Creutzberg CL. ESGO/ESTRO/ESP guidelines for the management of patients with endometrial carcinoma. *Int J Gynecol Cancer* **2021**, 31, 12-39. doi:10.1136/ijgc-2020-002230.
2. Kim G, Kurnit KC, Djordjevic B, Singh C, Munsell MF, Wang WL, Lazar AJ, Zhang W, Broaddus R. Nuclear  $\beta$ -catenin localization and mutation of the CTNNB1 gene: a context-dependent association. *Mod Pathol*. **2018**, 31, 1553-1559. doi: 10.1038/s41379-018-0080-0.
3. Liu Y, Patel L, Mills GB, Lu KH, Sood AK, Ding L, Kucherlapati R, Mardis ER, Levine DA, Shmulevich I, Broaddus RR, Zhang W. Clinical significance of CTNNB1 mutation and Wnt pathway activation in endometrioid endometrial carcinoma. *J Natl Cancer Inst*. **2014**, 106, dju245. doi: 10.1093/jnci/dju245.
